# Supplementary material for: Chia Seeds (Salvia Hispanica L.): An Overview—Phytochemical Profile, Isolation Methods, and Application
Source: MDPI journal article supplement (doi:10.3390/molecules25010011), 2019-12-18
Supplement: s1 [file s1]

Review

## Chia seeds (*Salvia hispanica* L.): an overview – Phytochemical profile, isolation methods and application

Maša Knez Hrnčič<sup>1,\*</sup>, Maja Ivanovski<sup>1</sup>, Darija Cör<sup>1</sup>, Željko Knez<sup>1,2</sup>

<sup>1</sup> Faculty of Chemistry and Chemical Engineering, University of Maribor, SI-2000 Maribor, Slovenia;

<sup>2</sup> Faculty of Medicine, University of Maribor, SI-2000 Maribor, Slovenia;

\* Correspondence: masa.knez@um.si;

Received: date; Accepted: date; Published: date

**Abstract:** Chia (*Salvia hispanica* L.) is a small seed that comes from an annual herbaceous plant, *Salvia hispanica* L. In recent years, usage of Chia seeds has tremendously grown due to their high nutritional and medicinal values. Chia was cultivated by Mesopotamian cultures, but then disappeared for centuries until the middle of the 20th century, when it was re-discovered again. Chia seeds contain healthy  $\omega$ -3 fatty acids, polyunsaturated fatty acids, dietary fiber, proteins, vitamins, and some minerals. Besides this, the seeds are an excellent source of polyphenols and antioxidants, such as caffeic acid, rosmarinic acid, myricetin, quercetin, and others. Today Chia has been analyzed in different areas of research. Researches around the world have been investigating the benefits of Chia seeds in medicinal, pharmaceutical, and food industry. Chia oil is today's one of the most valuable oils on the market. Different extraction methods have been used to produce oil.

In the present study, an extensive overview of the chemical composition, nutritional properties, antioxidant and antimicrobial activities, along with extraction methods used to produce Chia oil will be discussed.

**Keywords:** Chia seed; nutritional properties; active compounds; antioxidant activity; extraction methods

---

### 1. Introduction

*Salvia hispanica* L. (Figure 1), also known as Chia, is an annual herbaceous plant, originally from southern Mexico and northern Guatemala. It belongs to the order Lamiales, mint family Labiate, subfamily Nepetoideae, and genus *Salvia*. The genus *Salvia* consists of approximately 900 species, which have been widely distributed for thousands of years around several regions of the world, including Southern Africa, Central America, North and South America, and South-East Asia [1–8]. As reported in the literature, Chia today is not only cultivated in Mexico and Guatemala, but also in Australia, Bolivia, Columbia, Peru, Argentina, America, and Europe. Nowadays, Mexico is being recognized as the world's most largest Chia producer [2].

Historical records testify that *Salvia hispanica* L. was used beside corn, bean, and amaranth by ancient Mesoamerican cultures, Aztecs and Mayas, in preparation of folk medicines and food. In pre-Columbian societies, it was the second main crop after beans [3]. In the Aztecs communities, Chia was used for food, cosmetics, and religious rituals.

*Salvia hispanica* L. is mainly grown for its seeds and produces white and purple flowers, which are 3 to 4 mm small and hermaphrodites. The plant itself is sensitive to daylight, it can grow up to 1 m tall, leaves are reverse petiolate and serrated, 4 to 8 cm long, 3 to 5 cm wide. Chia seeds are generally very small, oval-shaped, 2 mm long, 1 to 1.5 mm wide, and thick less than 1 mm [2,5,6,9]. The color of the

seed varies from black, grey or black spotted to white. As Knez Hrnčič et al. [9] already reported, there is a marginal difference between black and white Chia seeds that most consider them equal. Nutritional values are similar – a protein content in black Chia seeds is 16.9%, a fiber content is 32.6%. In white Chia seeds the protein content is reported to be 16.5% and the fiber content 32.4%. A slight difference is only in morphology – white seeds are larger, thicker and broader compared to black seeds. It is worth to mention that when black chia seeds are cultivated, around 5 to 8% of white chia seeds are grown at the same time. Cultivating only white chia seeds gives white chia seeds only. Moreover, the plant itself can produce 500 to 600 kg seed/acre under appropriate agronomic conditions [3].

In recent years, Chia seeds have become one of the world's most recognizable food on the planet based on their nutritional properties and medicinal values [3,5–7,10]. Coorey et al. [11] reported that Chia is an excellent food ingredient since it contains the highest amount of  $\alpha$ -linolenic acid in all of the known food, and can be easily added to commercial food. It has been reported in several studies that Chia seeds due to the high percentage of fatty acids presented, can be crucial for health,, antioxidant and antimicrobial activity [3,6,12–14].

Furthermore, the word Chia comes from the Spanish word »chian« which means oily. According to different sources [1,10,15], Chia is oilseed, with a power house composed of fats, carbohydrates, dietary fiber, proteins, vitamins (A, B, K, E, D), minerals and antioxidants. The advantages of using Chia seeds as a nutritional supplement are enormous – positive benefits include supporting the digestive system, promoting healthy skin, stronger bones and muscles, reducing the risk of heart disease, diabetes, and so on [2,3,5,16]. It contains a high number of polyphenolic antioxidants; the seed is free from mytoxins and it does not contain gluten [3].

Lately, there have been many new discoveries regarding to nutritional properties, phytochemicals and extraction methods regarding to Chia seeds. The aim of this study is to present these findings, nutritional and therapeutic potential, focusing on extraction methods used on Chia seed.

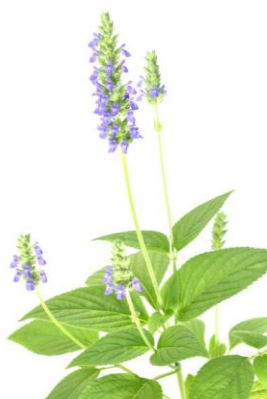

Figure 1: The plant of *Salvia hispanica* L. [17]

## 2. Chemical composition and phytochemicals in Chia seeds

The chemical composition of Chia seeds have been analyzed by many researchers [3,5,6,18]. Chia seeds contain high content of fats (30-33%), carbohydrates (26-41%), dietary fiber (18-30%), proteins (15-25%), vitamins, minerals, and antioxidants (wet basis) (Figure 2). Table 1 shows the nutritional profile of Chia seeds in 100 g stated by National Nutrient Database of USDA [42], and the comparison of its properties with other well-known cereals. Many researches on the phytochemicals have been reported. Pointing out, the major constituents of Chia oil are polyunsaturated fatty acids (PUFAs:  $\alpha$ -linolenic (ALA,  $\omega$ -3 fatty acid) and linoleic (LA,  $\omega$ -6 fatty acid) acids) [10]. Chia seeds contain 39% of oil (mass of dry seed), which consists up to 68% of  $\omega$ -3 and 19% of  $\omega$ -6 fatty acid [1,5]. Ratio between of  $\omega$ -6 and  $\omega$ -3 fatty acid is 0.3:0.35 [17]. Campos et al. [4] and Coates and Ayerza [18] stated that chemical composition of each product can vary due to different factors such as year of cultivation, environment of cultivation, and extraction method used. Coates and Ayerza [19] as well investigated the effect of temperature on the polyunsaturated fatty acids present in Chia seeds in Argentina. Their results have shown that during seed development, from April to May, the increase of the temperature, decreases the amount of polyunsaturated fatty acids (PUFAs) which are presented. According to the source in the literature, PUFAs are essential for human health, but cannot be synthesized by the human body itself, only with diet food human body receives them [20]. Furthermore, Musa Özcan et al. [21], investigated how microwave heating treatments at different powers are effecting physic-chemical properties of Chia seeds, including phenolic content, antioxidant activity and fatty acid composition. Results have shown that roasting Chia seeds in the microwave causes changes in the chemical composition of the Chia oil (such as varying the content of  $\alpha$ -linoleic acid or caffeic acid when using different powers).

Benefits of  $\omega$ -3 fatty acid on human body are following: lowering the content of three glycerides and cholesterol levels, anti-inflammatory activity, cardioprotective and hepatoprotective activities, antidiabetic action, protection against cancer, arthritis and autoimmune disease, meanwhile the benefits of  $\omega$ -6 are anti-inflammatory activity, anti-hypertensive, anti-thrombotic activities and anticancer activities [2,3,5,6,16]

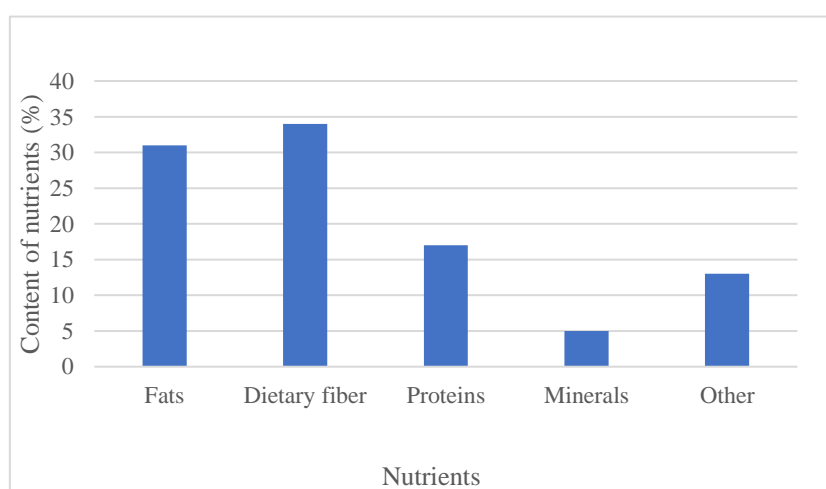

Figure 2: Basic composition of Chia seeds. [17]

**Table 1: Nutritional properties, vitamin, fatty acid and phenolic compounds content of Chia seeds and other cereals per 100 g. [5,22–31]**

|                                | Chia seeds | Rice | Corn | Wheat | Quinoa | Amaranth |
|--------------------------------|------------|------|------|-------|--------|----------|
| <b>Carbohydrates (g)</b>       | 42         | 80   | 74   | 71    | 64.2   | 71       |
| <b>Protein (g)</b>             | 17         | 6.5  | 9.4  | 12.6  | 14.1   | 12.6     |
| <b>Fat (g)</b>                 | 31         |      |      | 1.5   | 1.92   | 1.5      |
| <b>Minerals (mg)</b>           |            |      |      |       |        |          |
| Magnesium                      | 335        | 25   | 127  | 126   | 197    | 126      |
| Phosphorus                     | 860        | 115  | 210  | 288   | 457    | 288      |
| Calcium                        | 631        | 28   | 7    | 29    |        | 29       |
| Potassium                      | 407        | 115  | 287  | 363   | 563    | 363      |
| Sodium                         | 16         | /    | /    | /     | /      | /        |
| <b>Other (g)</b>               | 13         | /    | /    | /     | /      | /        |
| <b>Vitamins (mg)</b>           |            |      |      |       |        |          |
| Vitamin A eq.                  | 54 µg      | 0    | 214  | 9     | 0      | n.d.     |
| Vitamin E                      | 0.5        | 0.11 | 0.49 | 1.01  | 0.63   | 1.19     |
| Vitamin C                      | 1.6        | 0    | 0    | 0     | 0      | 4.2      |
| Thiamine (B1)                  | 0.62       | 0.07 | 0.39 | 0.30  | 0.11   | 0.12     |
| Riboflavin (B2)                | 0.17       | 0.05 | 0.20 | 0.12  | 0.11   | 0.2      |
| Niacin (B3)                    | 8.83       | 1.6  | 3.63 | 5.46  | 0.412  | 0.92     |
| <b>Fatty acid content (%)</b>  |            |      |      |       |        |          |
| Linolenic acid (C18:3, ω-3)    | 63.79      | 2.1  | 1    | 0.08  | 6.7    | 1.01     |
| Linoleic acid (C18:2, ω-6)     | 18.89      | 39.7 | 52   | 0.68  | 56.4   | 0.35     |
| Oleic acid (C18:1, ω-9)        | 7.3        | 35.1 | 31   | 0.24  | 20.4   | 22.69    |
| Palmitoleic acid (C16:1)       | 0.03       | /    | /    | /     | n.d.   | 0.08     |
| Eicosenic acid (20:1)          | n.d.       | /    | /    | 0.005 | n.d.   | 1.49     |
| Palmitic acid (C16:0)          | 7.04       | 20.8 | 13   | 3.02  | 9.7    | 18.59    |
| <b>Phenolic compounds (µg)</b> |            |      |      |       |        |          |
| Caffeic acid                   | 27         | n.d. | 26   | 40    | 37     | 0.90     |
| Quercetin                      | 0.17       | /    | /    | 30.1  | 43.3   | /        |
| Kaempferol                     | 0.013      | /    | /    | /     | 36.7   | /        |
| Daidzin                        | 6.6        | /    | /    | /     | /      | /        |
| Glycitin                       | 1.4        | /    | /    | /     | /      | /        |
| Genistin                       | 3.4        | /    | /    | /     | /      | /        |

### 2.1. Protein content

The protein content of Chia seeds is around 17% - it is greater than protein content in all other cereals (for instance, in corn the protein content is 9.4%, rice is 6.5%, quinoa 14.1% and in wheat 12.6%) [22,30,31]. The amount of the proteins in Chia seeds depends mainly upon environmental and agronomical factors [3]. The U.S. Department of Agriculture [17] has confirmed that Chia seeds contain some exogenous amino acids (arginine, leucine, phenylalanine, valine, and lysine) and some endogenous amino acids (glutamic and aspartic acid, alanine, serine, and glycine). For example, the content of amino acid serine is 1.05 g/100 g, glutamic acid 3.50 g/100 g, glycine 0.95 g/100 g, alanine 1.05 g/100 g, lysine 0.97 g/100 g and histidine 0.53 g/100 g [31]. The absence of protein gluten makes Chia seeds highly valued to patients suffering from celiac disease, moreover food rich in proteins is highly recommend to the people who are fighting the weight loss. Grancieri et al. [2] was investigating the composition and positive effects of Chia seeds, proteins and peptides, and their effect on the human body. A total of 20 proteins were obtained from Chia seeds, 8 of them were specially related to the production of the plant lipids, which are causing high concentrations of polyunsaturated fatty acids presented. Authors suggested further *in vitro* and *in vivo* investigations to investigate the properties of Chia proteins. Coelho and Salas-Mellado were investigating how the choice of extraction methods effects physical and functional properties of chia proteins [32]. The following methods were used: two methods of obtaining protein concentrates (chemical methods, CPC1, CPC2) and one method for obtaining a rich fraction (dry fractionation method, PRF). The protein content from the extracts were 70.9%, 74.1% and 49.7%, respectively. The results have shown that the optimal method used for investigation the protein content in the Chia seeds depends on the desired product. Following, Urbizo-Reyes et al. [33] investigated how biological and functional properties of Chia seeds protein hydrolysates improve when using ultrasonication to remove mucilage and how microwave-assisted enzymatic hydrolysis are generating bioactive and functional Chia seeds peptide.

### 2.2. Fibre content

Fibre content in Chia seeds is as well very high. Chia seeds contain between 34 g and 40 g of dietary fibre per 100 g [3,6]. In this specific amount, insoluble fraction (IDF) represents approximately 85-93%, while soluble fraction (SDF) represents between 7-15% [17]. Table 4. Reyes-Caudillo et al. [13] showed in their research that high amount of fibre decreases the risk of coronary heart disease, risk for diabetes type 2 and several types of cancer, furthermore high amount of dietary fibre in daily meal decreases subsequent hunger.

### 2.3. Minerals

Additionally, Chia seeds contain minerals like calcium, phosphorus, potassium, magnesium and vitamins (A, B, K, E, D, mainly vitamins B1, B2, niacin) (Table 1). The content of calcium, for instance, is greater than in rice, barley, corn, and oats.

The content of other minerals such as magnesium, potassium and phosphorus is in Chia seeds as well greater than in other cereals [30,31]

## 2.4 Phenolic compounds

Focusing on phenolic content, dry Chia seeds contain 8.8% of phenolics compounds. Beside that, the presence of high levels of caffeic acid, chlorogenic acid, querencetin, rosmarinic acid, gallic, cinnamic, myricetin, kaemferol is reported. Also, isoflavones, such as daidzein, glycitein, genistein are found in small amounts (Table 2). Rahman et al. [34] reported that rosmarinic acid and daidzein are the major components found in Chia seeds, with the presence of caffeic acid, mycertin, quercetin, etc. Besides, in the same study the vitamins A, B1, B2 and B3 were identified in Chia seeds for the first time. Flavonoids quercetin, chlorogenic acid and caffeic acid are proved to have anti-cancerogenic, anti-hypertensive and neuron protective effects [5]. Both Mohd Ali et al. [6] and Ullah et al. [3] mentioned that Chia seeds have no potentially toxic mycotoxins and gluten present. Furthermore, Uribe et al. [35] described that Chia seeds are great example of food rich with antioxidants. Reyes-Caudilio et al. [13] also stated that Chia seeds are great source of antioxidants with wide range of antioxidant compounds. Martinez-Cruz and Paredes-Lopez [36] used Chia seeds for analyzing total phenolic contents, antioxidant activity and qualification of phenolic acids and isoflavones by using ultra high performance liquid chromatography (UHPLC). With this methods major phenolic compounds were measured: rosmarinic acid, caffeic acid and daidzein. The all active compounds in *Slavia hispanica* are presented in Table 2.

Table 2: Active compounds in *Salvia hispanica* L.

| Active compounds in <i>Salvia hispanica</i> L. seeds        | Chemical structure                                                                  | Biological activity                                         | Reference          |
|-------------------------------------------------------------|-------------------------------------------------------------------------------------|-------------------------------------------------------------|--------------------|
| Omega-3 fatty acid, $\omega$ -3 fatty acid, $\omega$ -3 ALA | 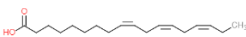 | - anti-inflammatory<br>- antidiabetic<br>- anticancer       | [6]                |
| Omega-6 fatty acid, $\omega$ -6 fatty acid, $\omega$ -6 LA  |  | - inflammatory<br>- anticancer                              | [6]                |
| <i>Flavonoids</i>                                           |                                                                                     |                                                             |                    |
| Myrcetin                                                    |  | - antioxidant                                               | [6]<br>[7]<br>[34] |
| Quercetin                                                   |  | - antioxidant<br>- anti-cancerogenic<br>- anti-hypertensive | [7]<br>[6]<br>[34] |
| Kaempferol                                                  |                                                                                     | - antioxidant                                               | [6,7]              |

|                  |                                                                                   |                                                             |                     |
|------------------|-----------------------------------------------------------------------------------|-------------------------------------------------------------|---------------------|
|                  | 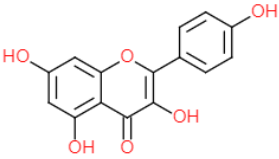 |                                                             | [6]                 |
| Caffeic acid     |  | - antioxidant<br>- anti-cancerogenic<br>- anti-hypertensive | [7]<br>[34]<br>[36] |
| Rosmarinic acid  |  | - antioxidant                                               | [7]<br>[34]<br>[36] |
| Chlorogenic acid |  | - antioxidant<br>- anti-cancerogenic<br>- anti-hypertensive | [34]                |
| Vitamins         | A                                                                                 | - healthy skin                                              | [34]                |
|                  | B1                                                                                | - for synthesizing ATP                                      | [34]                |
|                  | B2                                                                                | - for normal red blood cells working                        | [34]                |
|                  | B3                                                                                | -for normal nervous and digestion system working            | [34]                |

Some researchers reported that the chemical composition and nutritional values may vary due to climatic conditions, geographic location, nutrients, and year of cultivation [6]. For example, the composition of fatty acids may vary according to climate change and the altitude of the plant – the colder and higher is the region, the higher is the content of  $\omega$ -3 unsaturated fatty acid.

### 3. Antioxidant and Antimicrobial Activity

Chia seeds and its oil contain a large number of natural antioxidants such as tocopherols, phytosterols, carotenoids and polyphenolic compounds, which have already been discussed in Section 2. Polyphenolic compounds are the most important complexes that contribute to the antioxidant activity of Chia seeds. It is well known that they have the ability to scavenge free radicals, to chelate ions and to donate hydrogens [7]. Antioxidant compounds reduce the risk of chronic diseases (cancer and heart attack), they offer protection against some disorders such as diabetes, Alzheimer's and Parkinson's disease[2].  $\omega$ -3 fatty acids have the capability of blocking calcium and sodium channel dysfunctions, which can cause hypertension, they improve heart rate variability, and protects ventricular arrhythmia [37].

Antioxidant activities were also investigated by Sargi et al. [38] and Clau-Solis et al. [1]. Among the analytical techniques, for determination of the antioxidant activity ABTS<sup>+</sup> (monocationic radical from ABTS diammonium salt), DPPH (2,2-dyphenyl-1-picrylhydrazyl), and FRAP (fluorescence recovery after photobleaching) have been applied most recently. Sargi et al. [38] investigated antioxidant

activity of Chia seeds from Mexico and Argentina by using the above-mentioned techniques. Authors have considered that Chia seeds are capable of deactivating ABTS<sup>+</sup> cation radicals. The same authors also showed that Chia seeds exhibit the capacity to scavenge synthetic DPPH radicals and reduce iron ions. The same results were obtained by other authors such as Clau-Solis et al. [1] and Reyes-Caudillo et al. [13]. Reyes-Caudillo et al. [13] investigated antioxidant activity of phenolic compounds in Chia seeds. Chia seeds from two different regions in Mexico were extracted. ABTS<sup>+</sup> radical scavenging method together with  $\beta$ -carotene linoleic-acid principle and phospholipid liposome peroxidation were used in research to determine the antioxidant activity, whilst Guindani et al. [39] used ABTS<sup>+</sup> method to determine antioxidant activity as well. Alacantara et al. [40] investigated antioxidant activity by DPPH method

Grancieri et al. [2] stated in their research that to investigate the specific antioxidant activity further *in vitro* researches should be made.

Several authors investigated positive effects of the polyphenolic compounds in Chia seeds using different analytical techniques. Chemical compounds such as caffeic acid, ferulic acid, chlorogenic acid rosmarinic acid and flavonoids (quercetin, kaempferol, daidzein, etc.) have been mainly investigated by different analytical techniques, where particularly UHPLC (ultra-high performance liquid chromatography), HPLC (high performance liquid chromatography) in UPLC (ultra-performance liquid chromatography) analytical techniques stand out. Their biological activities vary from antioxidant, anti-aging, anti-hypertensive to anti-cancerogenic and anti-inflammatory.

If comparing Chia seeds to other cereals mentioned in this work, antioxidant activity of rice, corn, wheat, quinoa and amaranth have been also investigated and reported [41–45].

#### 4. Extraction methods

In several years, several extraction methods, techniques and solvents, were used for producing the chia oil. The intense research has been performed due to development of the concepts of green chemistry which demands the usage of less harmful solvents for extraction [10]. However, detailed studies to characterize the oil and investigate the influence of different extraction methods and conditions on antioxidant activity are still limited. Silva et al. [10] stated that due to primarily usage of Chia oil in the food industry, the extraction solvents must be compatible with requirements of the food industry. It is known that usage of different extraction methods are causing variation in the extraction yields, quality, and content of fatty acids, the content of dietary fibers, antioxidant content, etc. Clau-Solis et al. [1] and Knez Hrnčič et al. [9] report extraction of Chia oil conventionally by Soxhlet extraction. Non-polar conventional organic solvents such as *n*-hexane or ether are used. Advantages of using conventional solvent (CS) extraction are mainly the simplicity of the method, relatively high extraction yield, suitable functional characteristics of the oil (such as water holding, absorption capacity, organic molecule absorption, molecule stability), meanwhile the disadvantages are decreased antioxidant activity, due to the decomposition of thermolabile antioxidants, environmental and health concerns involved by using *n*-hexane.

Silva et al. [10] were studying the properties of Chia oil extracted by using different solvents (ethyl acetate, isopropanol and *n*-hexane). It was considered that in relation to the oil extraction, higher yields were obtained with *n*-hexane and ethyl acetate. Moreover, the solvent properties did not affect the properties of the oil and water-holding capacity was not affected by extraction process.



A more suitable extraction method has been recently used is supercritical fluid extraction (SFE) where carbon dioxide (CO<sub>2</sub>) is the most used solvent for SFE [46]. Entering into the supercritical state depends on both temperature and pressure. A “supercritical” solvent exhibits the features of both a liquid and a gas. It can slide into porous materials as well as dissolve them. Advantages of using SFE comparing to other techniques are usage of a solvent with low density, viscosity, surface tension, mild conditions of temperature and pressure, which leads to no degradation of the compounds. Not only CO<sub>2</sub>, but also other solvents can be used for SFE. Meanwhile, CO<sub>2</sub> has beneficial properties such as low temperature (31 °C) and low critical pressure (7.29 MPa). Ixtaina et al. [47] studied the effect of temperature, pressure and time on the SFE-CO<sub>2</sub> extraction of oil from Mexico based Chia seeds. Authors obtained Chia oil with characteristics: yield 92,8%, at 45 MPa, 80 °C and 300 min. The same authors, performed the same experiment on the material from different origin. Chia seeds from Argentina were used in this study where the authors obtained oil recoveries ranging from 82 % (25 MPa, 40 °C, 285 min) to 97% (45 MPa, 60 °C, 138 min) [48]. Guindani et al. [39] investigated the oil extraction from Chia seeds using SC-CO<sub>2</sub> and ethyl acetate as co-solvents. The highest extraction yield, 10.6%, with pure CO<sub>2</sub> was obtained at 30 MPa and 50 °C.

Supercritical extractions using CO<sub>2</sub> are common for extraction of Chia oil Subcritical extractions are also performed regularly, mostly by using propane in its subcritical state. The differing methods accomplish different goals. The pressure is maintained, while the temperature is taken below the supercritical threshold. The solvent still maintains some of hydrophobic extraction properties, but the lower temperatures protect fragile constituents from denaturing. Silva et al. [49] and Knez Hrnčič et al. [9] performed the subcritical extraction of oil with *n*-propane. The work of Knez Hrnčič et al. [9] demonstrates that extraction yield and composition of extracts from Chia seeds are slightly affected by the different process parameters studied (pressure, temperature). Additionally, it has been demonstrated that the composition of both, black and white Chia seed extract is similar. The use of different extraction conditions resulted in differing extraction yields but did not significantly affect the composition of extract. Higher operating pressures contributed to higher extraction yields when operating at higher temperature. It has been demonstrated that the composition of oils, obtained from both seed varieties is similar. Brunner’s equation was employed to model extraction kinetic curves and the accuracy of the model with experimental data has been proven. The agreement between experimental and model data was from 3.13% to 7.27%. GC analyses confirmed presence of palmitic, stearic, oleic, linoleic and linoleic acids. Linolenic acid is represented in the highest amount which increased with elevating operating pressure. Propane has been demonstrated as a suitable processing media for extraction of oils with a high content of the two essential fatty acids ( $\alpha$ -linolenic acid and linoleic acid). It can be concluded that high operating pressure contributes to the higher extraction yield and the higher content of linolenic acid, the major compound in the extracted oils. The results suggest that the subcritical extraction with food grade *n*-propane is a potential method for obtaining high-quality chia seed oil, providing a product free of toxic residues, and therefore, suitable for subsequent use in food, pharmaceutical, and cosmetic industries.

Villanueva-Bermejo et al. [20] used liquid-pressured extraction method for Chia oil extraction when *n*-hexane, ethyl acetate and aqueous ethanol were used as a solvents. Authors extracted oil of Chia with two different batches of Mexican Chia seeds, high oil content seeds (HOCS) and low oil content seeds (LOCS). Supercritical fluid extraction (SFE) and pressured liquid extraction (PLE) have been applied. No differences were found between the fatty acid profile of the oils extracted from HOCS

and LOCS by both extraction methods. Chia seed oil was nanoencapsulated utilizing Chia seed mucilage as wall material [50]. The aim of the study was to evaluate if mucilage can be used for wall material, to characterize the Chia seed oil nanoparticles and determine its stability. The effect of different parameters such as temperature, the solvent to seed ratio and extraction time in the ultrasound-assisted extraction (UAE) from chia seeds provided high yields in the extraction, and the chemical analyses indicated polyunsaturated fatty acids, are the major oil components (82% of the total oil composition) by using ethyl acetate as a solvent. Ethyl acetate is considered a food-grade solvent, accepted in the food industry [51]. Extraction methods with extraction yield are presented in Table 3.

Table 3: Extraction methods, extraction yields and fatty acid content.

|    | Methods of extraction                | Solvent                                               | Extraction yield (%) <sup>a</sup> |                  | Fatty acid content (%) <sup>a</sup> |                  |                       |                  | Reference |
|----|--------------------------------------|-------------------------------------------------------|-----------------------------------|------------------|-------------------------------------|------------------|-----------------------|------------------|-----------|
|    |                                      |                                                       | White Chia seeds                  | Black Chia seeds | $\omega$ -3                         |                  | $\omega$ -6           |                  |           |
|    |                                      |                                                       |                                   |                  | White Chia seeds                    | Black Chia seeds | White Chia seeds      | Black Chia seeds |           |
| 1  | Cold solvent extraction              | <i>n</i> -hexane                                      | 30.0                              | 30.0             | Not evaluated                       | 3.5              | 4.0                   | 2.97             | [52]      |
| 2  | Cold solvent extraction              | <i>n</i> -hexane                                      | 42                                |                  | Not evaluated                       |                  | Not evaluated         |                  | [53]      |
| 3  | Cold solvent extraction              | <i>n</i> -hexane                                      | 19.3                              |                  | 67.9                                |                  | 17.6                  |                  | [54]      |
| 4  | Soxhlet extraction                   | <i>n</i> -hexane<br>ethyl acetate<br>ethanol          | 13.8                              |                  | 62.8                                |                  | 20.1                  |                  | [39]      |
|    |                                      |                                                       | 12.10<br>15.4                     |                  | Not evaluated<br>64.1               |                  | Not evaluated<br>19.9 |                  |           |
| 5  | Soxhlet extraction                   | <i>n</i> -hexane                                      | Not evaluated                     | Not evaluated    | 48.52                               | 48.66            | 17.98                 | 17.98            | [9]       |
| 6  | Soxhlet extraction                   | <i>n</i> -hexane                                      | 10.9                              |                  | Not evaluated                       |                  | Not evaluated         |                  | [1]       |
| 7  | Soxhlet extraction                   | <i>n</i> -hexane                                      | 34.6                              | 35.6             | Not evaluated                       | 3.5              | 4.0                   | 2.97             | [52]      |
| 8  | Soxhlet extraction                   | <i>n</i> -hexane                                      | 25.7 – 32.2                       |                  | 54.4 – 54.4                         |                  | 20.2 – 21.8           |                  | [46]      |
| 9  | Soxhlet extraction                   | <i>n</i> -hexane                                      | Not evaluated                     |                  | Not evaluated                       |                  | Not evaluated         |                  | [12]      |
| 10 | Soxhlet extraction                   | <i>n</i> -hexane                                      | 26.7 – 33.6                       |                  | 65.6 – 69.3                         |                  | 16.6 – 19.7           |                  | [48]      |
| 11 | Soxhlet,<br>Ultrasonic<br>extraction | <i>n</i> -hexane,<br>ethyl<br>acetate,<br>isopropanol | 33.6                              |                  | 62.4                                |                  | 19.6                  |                  | [10]      |
|    |                                      |                                                       | 30.2                              |                  | 62.4                                |                  | 19.4                  |                  |           |
|    |                                      |                                                       | 25.6                              |                  | 62.9                                |                  | 19.8                  |                  |           |
| 12 | Ultrasonic extraction                | <i>n</i> -hexane                                      | Not evaluated                     |                  | 51.5                                | 46.4             | 19.5                  | 19.5             | [9]       |

|    |                                                                        |                         |               |               |               |      |      |      |      |
|----|------------------------------------------------------------------------|-------------------------|---------------|---------------|---------------|------|------|------|------|
| 13 | Ultrasound extraction                                                  | <i>n</i> -hexane        | 10.6          | 59.6          | 22.1          | [39] |      |      |      |
|    |                                                                        | ethyl acetate           | 11.2          | Not evaluated | Not evaluated |      |      |      |      |
|    |                                                                        | ethanol                 | 11.3          | Not evaluated | Not evaluated |      |      |      |      |
| 14 | Cold pressing and DCS                                                  | ethanol                 | Not evaluated | Not evaluated | Not evaluated | [55] |      |      |      |
| 15 | Ultrasound extraction                                                  | acetone                 | Not evaluated | Not evaluated | Not evaluated | [34] |      |      |      |
| 16 | Ultrasound liquid-liquid extraction                                    | methanol-water solution | Not evaluated | Not evaluated | Not evaluated | [56] |      |      |      |
| 17 | Supercritical fluid extraction                                         | CO <sub>2</sub>         | 88.1          | 63.4          | 35.8          | [47] |      |      |      |
| 18 | Supercritical fluid extraction                                         | CO <sub>2</sub>         | 7.2           | 66.0          | 18.2          | [35] |      |      |      |
| 19 | Supercritical fluid extraction                                         | CO <sub>2</sub>         | 10.6          | 62.3          | 19.7          | [39] |      |      |      |
| 20 | Supercritical fluid extraction                                         | CO <sub>2</sub>         | 27.8 – 31.8   | 52.5 – 55.9   | 19.8 – 20.9   | [46] |      |      |      |
| 21 | Supercritical fluid extraction                                         | CO <sub>2</sub>         | 17.5          | Not evaluated | Not evaluated | [53] |      |      |      |
| 22 | Supercritical fluid extraction                                         | ethanol                 | 64.5 – 90.3   | 65.0 – 68.0   | 17.0 – 23.0   | [20] |      |      |      |
| 23 | Supercritical fluid extraction (with/without ultrasound and cosolvent) | CO <sub>2</sub>         | 24.6          | 68.3          | 18.6          | [57] |      |      |      |
| 24 | Subcritical fluid extraction                                           | <i>n</i> -propane       | Not evaluated | 47.3          | 46.2          | 17.8 | 17.5 | [9]  |      |
| 25 | Pressing                                                               | /                       | 20.3 – 24.8   | 64.5 – 69.3   | 16.6 – 17.5   | [58] |      |      |      |
| 26 | Pressing                                                               | /                       | 20.1          | 67.9          | 19.1          | [59] |      |      |      |
| 27 | Pressurized liquid extraction                                          | ethanol                 | 17.7 – 19.9   | 65.0 – 68.0   | 17.0 – 23.0   | [20] |      |      |      |
| 28 | Pressurized liquid extraction                                          | <i>n</i> -hexane        | Not evaluated | 65.5          | 18.1          | [60] |      |      |      |
| 29 | Screw pressing                                                         | <i>n</i> -hexane        | 9.5           | 9             | Not evaluated | 3.5  | 4.0  | 2.97 | [52] |

|    |                                                   |                           |               |               |               |      |
|----|---------------------------------------------------|---------------------------|---------------|---------------|---------------|------|
| 30 | Seed compression                                  | /                         | Not evaluated | Not evaluated | Not evaluated | [9]  |
| 31 | Cold press and ultrasound                         | Methanol                  | Not evaluated | 66.8 – 68.7   | 19.2 – 21.7   | [21] |
| 32 | High pressure extraction                          | /                         | 20.01         | Not evaluated | Not evaluated | [53] |
| 33 | Alkaline extraction and isoelectric precipitation | /                         | Not evaluated | Not evaluated | Not evaluated | [32] |
| 34 | Ultrasound-assisted extraction                    | <i>n</i> -hexane          | Not evaluated | Not evaluated | Not evaluated | [16] |
| 36 | Hot solvent extraction                            | Water and aqueous ethanol | Not evaluated | Not evaluated | Not evaluated | [61] |

<sup>a</sup> Highest amounts are presented.

## 5. Applications of Chia seeds and derived products

Over the past few years functional foods have gained remarkable consideration world-wide due to the wave of healthy lifestyle changes. Contemporary, chia seed is used as a healthy oil supplement for humans and animals. In Figure 3 it can be seen the usage of a Chia plant and some products obtained from chia seeds.

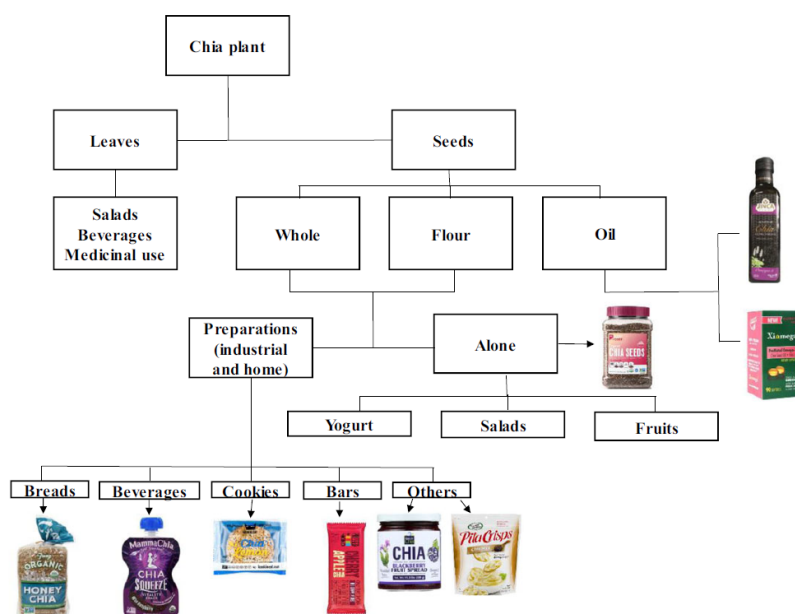

Figure 3: Usage of chia seeds in the industry. [2]

### 5.1. Food Industry

Several studies have been performed on the usage of Chia seeds in the food industry. In the food industry, Chia seeds can be used in different shapes: whole, ground, in the form of flour, oil, and gel [5]. In 2000, the US Dietary guidelines suggested that Chia can be used as primary food, but in a limited amount; consumption of no more than 48 g/daily is recommended. Chia seeds can be added or mixed into biscuits, pasta, cereals, snacks and cakes as supplements. Due to their hydrophilic properties, Chia seeds can be used as substitutes for eggs and fat. They can absorb 12 times more water than their weight is [5].

Chia gel may be used as substitutes for oil or eggs in baked products. It was shown that Chia seeds in the shape of oil can replace 25% of eggs in the cakes [18].

*Nutritional value of butter oil can be increased by mixing with Chia oil* in a proportion from 6.5% to 25%, in that manner the concentration of  $\omega$ -3 fatty acid in Chia fortified butter increases from 4.17% to 16.74% [3].

Besides, recent studies showed that mucilage from Chia seeds can be used as a functional coating with improved functional properties [3].

- *Chia mucilage*

Chia mucilage could be employed in the food industry as a foam stabilizer, a suspending agent, emulsifier, adhesive or binder, as a result of its water holding capacity, and viscosity. Recent studies showed that mucilage from Chia seeds can be used as a functional coating with improved functional properties [3]. Compared with other hydrocolloids such as gum arabic, modified starch and cellulose, chia mucilage has a low EAI - Emulsifying activity index. The mucilage showed a significant ability to stabilize emulsions; however, the potent was affected by the emulsion composition. The fact that the mucilage has such an ability to stabilize emulsions may be due to its capacity to adsorb in the solid or liquid interface and stabilize emulsions without chemical or enzymatic variations. Mucilage obtained from chia seeds is a novel source of polysaccharides and could potentially generate interesting polymer blends for edible films and coating.

Edible films based on polysaccharides are potential substitutes for synthetic packaging. Mucilage has the ability to form edible films, but they are very slight and brittle. The addition of plasticizers may be carried out to advance the mechanical characteristics of edible films. Different plasticizers such as polyols, have been applied to increase the flexibility and workability of such films. Amongst the plasticizers, glycerol is one of the most widely applied in film-making techniques. The chia mucilage hydrocolloid is an interesting constituent that may be applied for the design of new film-forming solutions. The addition of glycerol to extracted hydrocolloid from the chia seed to make chia mucilage films was essential to provide homogenous and flexible films and is crucial to achieve the suitable physicochemical, barrier, and mechanical properties. The solubility of chia mucilage films can be fine-tuned by the glycerol content and improved with higher proportion of glycerol [62]. Water solubility in the chia mucilage films plasticized with different concentrations of glycerol increased considerably.

- *Chia gum*

Chia seeds are believed to be starting material in the food industry for its dietary fiber. Gum can be extracted from dietary fiber fraction by using special treatment of seeds with water for use as an

additive to control viscosity, stability, and texture. The chemical composition, molecular structure and the derived properties such as thermal stability or gelling ability represent important factors which determinate the appropriateness of a polysaccharide in food and pharmaceutical industries. The gum is also stable at high temperature, way up to 224 °C. Ciau-Solis et al. [1] were investigating the chemical and functional properties of Chia seed gum. It was showed that chia gum contains 26.2% of fat and when submitted to fat extraction two fractions of the gum can be produced: gum with fat (FCG) and gum partially defatted (PDCG). It was confirmed that PDCG has a higher content of protein, ash, and carbohydrate than FCG. Chia seed gum is a novel promising material. However, due to limited information on the structural composition it has not yet been industrially applied. Few investigations have been carried out on its thermal stability and functionality. Understanding of these characteristics will significantly broaden the potential of industrial application [63].

### 5.2. Pharmaceutical use

Bilayer emulsions has potential as delivery systems of  $\omega$ -3 fatty acids from chia oil which represents a high potential in pharmaceutical applications and food industry since the emulsions can be used directly or subjected to a drying process to obtain powders. Due to the relative ease of synthesis and economic feasibility conventional oil-in-water (O/W) emulsions are usually the first choice considered to deliver bioactive lipids. Chia oil can be incorporated into oil-in-water (O/W) emulsions as  $\omega$ -3 fatty acid delivery systems in food matrices. Sodium caseinate content and lactose addition strongly influence the stability and rheological properties of chia O/W emulsions. A moderate stability of chia O/W emulsions and Newtonian behavior is achieved by the stabilization with a certain amount of emulsifier. Chia O/W emulsions have demonstrated low levels of primary and secondary oxidation products [64]. In the study of M. Julio and co-authors [65] chia bilayer O/W emulsions were obtained applying layer-by-layer deposition technique. It consisted of the electrostatic deposition of positively charged chitosan on negatively charged oil droplets. These were stabilized using modified sunflower lecithins (deoiled or phosphatidylcholine-enriched) in presence or absence of maltodextrin.

A recent study [66] reports that spray dried chia seed oil (CSO) microcapsules were prepared by using chia seed protein isolate (CPI), chia seed gum (CSG) and CPI-CSG complex coacervate as shell materials. CPI-CSG complex coacervate was found to be suitable for delivery of CSO to intestinal stage of digestion since almost all the unencapsulated oil was hydrolysed, whereas only 60% of the oil encapsulated in CPI-CSG shell was hydrolysed during *in vitro* digestion. It is reported that leaves of *Salvia hispanica* L. contain an essential oil that comprises  $\beta$ -caryophyllene, globulol,  $\beta$ -pinene,  $\alpha$ -humoleno and widdrol. Those compounds are believed to have strong repellent characteristics to a wide specter of insects [3].

## 6. Therapeutic value

Therapeutic values of Chia seeds have been reported as well. Some of them are presented also in Table 4. For example, cardio-protective effects have been analyzed by Munoz et al. [15].  $\alpha$ -linolenic acid plays a significant role in the formation of some vital biochemical compounds such as leukotrienes and thromboxanes, which are connected to numerous physiological functions in the human body [3]. Moreover,  $\omega$ -3 fatty acid has a capability of blocking calcium and sodium channels

disfunctions (which can cause hypertension), improve the parasympathetic tone and protect ventricular arrhythmia [3]. Furthermore, eating Chia seeds in the pregnancy helps to develop retina and brain of fetus.

Consequently, incorporating of dietary fiber and  $\alpha$ -linolenic fatty acids into the diet makes Salba-chia a prime contender in regulating body weight and possibly other comorbidities associated with diabetes. A study of Vuksan and co-workers demonstrated that supplementing 37 g/day of Salba-chia to an isocaloric diet improved major and emerging risk factors in type 2 diabetes, suggesting its cardioprotective potential, while maintaining weight. A subsequent study by the same group demonstrated that Salba-chia acutely reduced postprandial glycemia when added to a meal and prolonged satiety. Further investigations demonstrated that a 6-month addition of Salba-chia to a calorie-restricted diet, in conjunction with the standard medical care, resulted in small, but significant, weight loss in overweight and obese participants with type 2 diabetes [67]. Comparison of the effect of two seeds (flax (*Linum usitatissimum*) and Salba-chia (*Salvia hispanica* L.)) on postprandial glycemia and satiety scores showed that despite the similarities in nutritional composition, Salba-chia appears to have the ability to convert glucose into a slow-release carbohydrate and affect satiety to a greater extent than flax, possibly due to the higher fiber viscosity. Fifteen healthy participants (M/F: 5/10; age:  $23.9 \pm 3$  years; BMI:  $22.2 \pm 0.8$  kg/m<sup>2</sup>) were randomized to receive a 50 g glucose challenge, alone or supplemented with either 25 g ground Salba-chia or 31.5 g flax, on three separate occasions. Blood glucose samples and satiety ratings were collected at fasting and over 2-h postprandially. In addition, *in vitro* viscosity of the beverages was assessed utilizing standard rheological methodology. Both seeds appeared to differentially alter carbohydrate metabolism and satiety, with Salba-chia having a stronger effect than flax. The 39% reduction in blood glucose iAUC (Incremental Area under the Curve) observed for ground Salba-chia in the current study is in line with the reductions from previous studies of 35 and 42% vs control at a comparable dose of 24g. In contrast, ground flax has not been previously shown to affect postprandial glycemia. Though there is a slight suspicion that high fiber seeds should be promoted for their nutritional properties, the current findings suggest that the criteria for selection should also include their rheological properties rather than their absolute fiber content. Namely, viscosity is considered as a measure of the fiber's contribution to viscosity development, independent of fiber concentration [68]. The consumption of chia flour is consistently able to decrease the blood pressure in hypertensive individuals, even in patients previously treated with medications in a manner similar to the patients not using medications [69]. Despite the reduction in lipid peroxidation as effect of chia, there was no verification whether this effect would be accompanied by increased antioxidant capacity. The effectiveness of milled and whole chia seed in altering disease risk factors in overweight, postmenopausal women were studied using a metabolomics approach. 62 overweight (body-mass index  $\geq 25$  kg/m<sup>2</sup> and higher), nondiseased, nonsmoking, postmenopausal women, ages 49–75 years have been included. The study was performed by the means of analysis based on the 56 subjects who completed all phases of the study - diet records and questionnaire responses to assess potential adverse effects and adherence to the supplementation regimen were administered as a prestudy, and after 5- and 10-week supplementation.

The results of a research performed over male Wistar rats disclosed that feeding Chia seed had a great declining effect on triglycerides and enhanced the beneficial HDL cholesterol [70]. Additionally, feeding Chia seed resulted in a reduction of omega-6 in plasma, which consequences

in a lower  $\omega$ -6:  $\omega$ -3 ratio and has a subsequent cardio-protective effect. The effect of feeding Chia seed (50 g/day) to 12 healthy individuals for 30 days was investigated by Vertommen and co-workers. The diastolic blood pressure decreased from 66.1 to 61.5 mmHg with significant decline in serum triglycerides and no side effect was reported [71].

Other studies were carried out to investigate therapeutic effects which demonstrate Chia seeds as potential source of several bio-active peptides, essential for repair of damaged tissue and general well-being[72], control of dyslipidaemia [13], anti-inflammatory agent [73]. Antiplatelet, anti-carcinogenic, laxative, hypotensive, cardiac tonic, cardiovascular protector, treatment of anaemia, improves dermatitis, analgesic[74]. Antidepressant, antianxiety, vision and immune improver [57] and EPA and DHA improver in blood [75]. Appearance of celiac disease, constipation and vasodilatation [76] as well as risk of kidney disorders may be decreased by complementary consumption of whole and ground versions of chia along with its oil.

Table 4: Clinical studies of the therapeutic value of the Chia seeds.

| <b>Aim of the study</b>                                                                                                                                                | <b>Clinical setting</b>                                                                                                                                                   | <b>Study description</b>                                                                                                                                       | <b>Result</b>                                                                                                                                                                           | <b>Reference</b> |
|------------------------------------------------------------------------------------------------------------------------------------------------------------------------|---------------------------------------------------------------------------------------------------------------------------------------------------------------------------|----------------------------------------------------------------------------------------------------------------------------------------------------------------|-----------------------------------------------------------------------------------------------------------------------------------------------------------------------------------------|------------------|
| Assessment of the effect of Salba-chia on body weight, visceral obesity and obesity-related risk factors in overweight and obese adults with type 2 diabetes.          | - Changes in body weight and in waist circumference,<br>- body composition,<br>- glycemic control,<br>- level of C-reactive protein and obesity-related satiety hormones. | - Two parallel groups with 77 over-weight or obese patients with type 2 diabetes were evaluated.                                                               | - Significant weight loss,<br>- reduction in waist circumference and C-reactive protein<br>- increase of plasma adiponectin.                                                            | [67]             |
| Comparison of the effect of two seeds (flax ( <i>Linum usitatissimum</i> ) and Salba-chia ( <i>Salvia hispanica L.</i> )) on postprandial glycemia and satiety scores. | Blood glucose samples and satiety ratings were collected at fasting and over 2-h postprandially.                                                                          | - Fifteen healthy participants (<br>- randomized to receive a 50 g glucose challenge, alone or supplemented with either 25 g ground Salba-chia or 31.5 g flax. | - Salba-chia appears to have the ability to convert glucose into a slow-release carbohydrate<br>- and affect satiety to a greater extent than flax (due to the higher fiber viscosity). | [68]             |
| Influence of Ingesting Chia Seed Oil on Human                                                                                                                          | - A randomized (1:1 allocation, random number                                                                                                                             | - After providing a blood sample at                                                                                                                            | - Ingestion of chia seed oil 30 min before                                                                                                                                              | [78]             |



|                                                                                                                         |                                                                                                                                                                                                                                     |                                                                                                                                                                                                                                                                                                                |                                                                                                                                                             |
|-------------------------------------------------------------------------------------------------------------------------|-------------------------------------------------------------------------------------------------------------------------------------------------------------------------------------------------------------------------------------|----------------------------------------------------------------------------------------------------------------------------------------------------------------------------------------------------------------------------------------------------------------------------------------------------------------|-------------------------------------------------------------------------------------------------------------------------------------------------------------|
| Running Performance                                                                                                     | generator), - crossover approach, and - subjects engaged in two run-to-exhaustion trials after acute ingestion of flavored water with chia seed oil or flavored water alone (no blinding), with at least a two-week washout period. | 8:00 am, subjects ingested 0.5 liters flavored water alone or 0.5 liters water with 7 kcal kg <sup>-1</sup> chia seed oil (random order), provided another blood sample at 8:30 am, and then started running to exhaustion. - Additional blood samples were collected immediately post- and 1-h post-exercise. | running caused an increase in plasma ALA levels, - no discernable benefits for the athletes in this study.                                                  |
| Effect of chia supplementation (Salvia hispanica L.) on blood pressure (BP) and its associated cardiometabolic factors. | - Hypertensive individuals of both sexes, - randomized, double-blind, experimental and placebo-controlled study.                                                                                                                    | - Nutritional assessment, - clinical BP measurement, - ambulatory blood pressure monitoring (ABPM), - collection of blood samples.                                                                                                                                                                             | - The consumption of the chia or the placebo caused no gastrointestinal, hepatic or renal disorders, - decrease of the BP in hypertensive individuals. [69] |
| Effectiveness of milled and whole chia seed in altering disease risk factors in overweight, postmenopausal women.       | - Metabolomics approach using gas chromatography–mass spectrometry with multivariate statistical methods, - including principal component analysis and partial least-                                                               | - Subjects ingested 25 g chia seed or placebo supplements each day for 10 weeks,. - body mass and composition, blood pressure and                                                                                                                                                                              | Ingestion of 25 g/day milled chia seed compared to whole chia seed or placebo for 10 weeks by overweight women [79]                                         |

|                                                                                                                                                                                                                                                                                                     |                                                                                           |                                                                                                                                                                                                                                                                                                                                                                |                                                                                                                                                    |
|-----------------------------------------------------------------------------------------------------------------------------------------------------------------------------------------------------------------------------------------------------------------------------------------------------|-------------------------------------------------------------------------------------------|----------------------------------------------------------------------------------------------------------------------------------------------------------------------------------------------------------------------------------------------------------------------------------------------------------------------------------------------------------------|----------------------------------------------------------------------------------------------------------------------------------------------------|
|                                                                                                                                                                                                                                                                                                     | square discriminant analysis (PLS-DA).                                                    | augmentation index, serum lipid profile, inflammation markers from fasting blood samples, plasma fatty acids, and metabolic profiling.                                                                                                                                                                                                                         | increased plasma ALA and EPA, but had no influence on inflammation or disease risk factors using both traditional and metabolomics-based measures. |
| Evaluation of the effects of a dietary pattern (DP; soy protein, nopal, chia seed, and oat) on the biochemical variables of MetS, the AUC for glucose and insulin, glucose intolerance (GI), the relationship of the presence of certain polymorphisms related to MetS, and the response to the DP. | A single-center, randomized, placebo-controlled, double-blind, parallel-arm study.        | - In the first stage, participants were instructed to consume a reduced energy diet according to (23) and a low-saturated fat and low-cholesterol diet for 2 wk (5).<br>- During the second stage of the study, participants were randomly assigned to consume either the dietary pattern (DP) or placebo (P) in addition to the reduced energy diet for 2 mo. | - BW, BMI, and WC decreased,<br>- no changes in the percentages of the lean or fat mass in either group after the dietary treatment. [80]          |
| Assessment of Omega 3 chia seed loading as a means of Carbohydrate loading.                                                                                                                                                                                                                         | -CHO-loading treatments were based on the subject's body weight and were thus isocaloric. | Comparison of the performance testing results between 2 different CHO-                                                                                                                                                                                                                                                                                         | - No statistical difference ( [81]<br>between Omega 3 Chia loading and CHO loading.                                                                |

## 7. Conclusions

Chia, *Salvia hispanica* L., is a plant species used since the ancient times for dietary and medical purposes. Its products are small dry white and dark seeds.

In recent times, there have been many discussions and researches about the health benefits and use of this seed. Chia seeds contain a high content of fats, carbohydrates, dietary fiber, proteins, vitamins (A, B1, B2 and B3), minerals, and antioxidants. Also, Chia seeds contain flavonoids quercetin, chlorogenic acid and caffeic acid that is proven to have anti-carcinogenic, anti-hypertensive and neuron protective effects. Furthermore, Chia seeds are a rich source of nutrients such as polyunsaturated omega-3 fatty acids that protect from inflammation, improve cognitive performance and lower the level of cholesterol. Chia seeds contain antioxidant compounds that reduce the risk of chronic diseases (cancer and heart attack) and offer protection against some disorders such as diabetes, Alzheimer's and Parkinson's disease. Moreover, the high amount of fibre decreases the risk of coronary heart disease, the risk for diabetes type 2 and several types of cancer.

Chia seeds are already used in the food and pharmaceutical industry. In the food industry, Chia seeds can be used in different forms: as the whole seed, ground, in the form of flour, oil, and gel. Chia oil is today's one of the most valuable oils on the market. Nanoemulsion-based delivery systems are perspective application to encapsulate lipophilic bioactive components in food, personal care, cosmetic, and pharmaceutical applications. Chia seed oil nanoemulsion delivery system represent a possibility for the further application of chia seed oil in beverages and functional food industry which required only slightly turbid or even transparent appearance. Chia seed mucilage represents a promising alternative to substitute synthetic polymers in nanoencapsulation.

Different extraction methods and solvents such as Soxhlet extraction using *n*-hexane, ethyl acetate and aqueous ethanol, supercritical fluid extraction with CO<sub>2</sub> and pressured-liquid extraction have been proposed to obtain oil. Compression method comprises pressing the seeds at 4 °C or 25 °C in dark. This contributes to preservation of antioxidants, nevertheless, oil recovery is low. Soxhlet extraction using *n*-hexane is advantageous due to functional characteristics like absorption capacity and emulsifying stability. On the other hand, this method is least preferred as it poses health issues from the use of hexane. Sub and supercritical fluid extraction are currently the most promising alternatives that yield a better purity of ALA. The oil yield is increased with a pressure elevation. The supercritical fluid extraction (SFE) and the pressured liquid extraction (PLE) of oil was performed from high oil content seeds (HOCS) and low oil content seeds (LOCS). The results show no difference in the fatty acid profile of the oils extracted from HOCS and LOCS by both extraction methods.

Despite several epidemiological and experimental reports promote the medicinal use (oral supplements) of Chia, protocols regarding extraction and effective dose should be standardized in order to suit the human consumption on a large scale, supported by sound scientific data. Dietary Chia provides an array of pharmacological properties, but knowledge on understanding the nature of bioactive and fatty acids responsible for its biological activity using mechanistic approaches in cell

and mammal models are still the main limitation on the way to its wider therapeutic usage.

**Acknowledgments:** The authors would like to acknowledge Slovenian Research Agency (ARRS) for financing research in frame of Programme P2-0046 and the Slovenian Ministry of Education, Science and Sports (grants F4F and AB FREE) as well as Tovarna olja GEA d.o.o., Slovenska Bistrica, Slovenia, EU.

## References

1. Ciau-Solís, N.; Rosado-Rubio, G.; Segura-Campos, M.R.; Betancur-Ancona, D.; Chel-Guerrero, L. Chemical and Functional Properties of Chia Seed (*Salvia hispanica* L.) Gum. *Int. J. Food Sci.* **2014**, *2014*, 1–5.
2. Grancieri, M.; Martino, H.S.D.; Gonzalez de Mejia, E. Chia Seed (*Salvia hispanica* L.) as a Source of Proteins and Bioactive Peptides with Health Benefits: A Review. *Compr. Rev. Food Sci. Food Saf.* **2019**, *18*, 480–499.
3. Ullah, R.; Nadeem, M.; Khalique, A.; Imran, M.; Mehmood, S.; Javid, A.; Hussain, J. Nutritional and therapeutic perspectives of Chia (*Salvia hispanica* L.): a review. *J. Food Sci. Technol.* **2016**, *53*, 1750–1758.
4. Campos, B.E.; Dias Ruivo, T.; da Silva Scapim, M.R.; Madrona, G.S.; de C. Bergamasco, R. Optimization of the mucilage extraction process from chia seeds and application in ice cream as a stabilizer and emulsifier. *LWT - Food Sci. Technol.* **2016**, *65*, 874–883.
5. Das, A. Advances in Chia Seed Research. *Adv. Biotechnol. Microbiol.* **2018**, *5*, 5–7.
6. Mohd Ali, N.; Yeap, S.K.; Ho, W.Y.; Beh, B.K.; Tan, S.W.; Tan, S.G. The promising future of chia, *Salvia hispanica* L. *J. Biomed. Biotechnol.* **2012**, *2012*, 1–9.
7. de Falco, B.; Amato, M.; Lanzotti, V. Chia seeds products: an overview. *Phytochem. Rev.* **2017**, *16*, 745–760.
8. Gérard, F. Chia seed CO<sub>2</sub> extract: A revolutionary ingredient for food and cosmetics. 1–4.
9. Knez Hrnčič, M.; Cör, D.; Knez, Ž. Subcritical extraction of oil from black and white chia seeds with n-propane and comparison with conventional techniques. *J. Supercrit. Fluids* **2018**, *140*, 182–187.
10. Silva, C.; Garcia, V.A.S.; Zanette, C.M. Chia (*Salvia hispanica* L.) oil extraction using different organic solvents: Oil yield, fatty acids profile and technological analysis of defatted meal. *Int. Food Res. J.* **2016**, *23*, 998–1004.
11. Coorey, R.; Grant, A.; Jayasena, V. Effects of Chia Flour Incorporation on the Nutritive Quality and Consumer Acceptance of Chips. *J. Food Res.* **2012**, *1*, 85.
12. Ixtaina, V.Y.; Nolasco, S.M.; Tomás, M.C. Physical properties of chia (*Salvia hispanica* L.) seeds. *Ind. Crops Prod.* **2008**, *28*, 286–293.
13. Reyes-Caudillo, E.; Tecante, A.; Valdivia-López, M.A. Dietary fibre content and antioxidant activity of phenolic compounds present in Mexican chia (*Salvia hispanica* L.) seeds. *Food Chem.* **2008**, *107*, 656–663.
14. Ayerza, R. Crop year effects on seed yields, growing cycle length, and chemical composition of chia (*Salvia hispanica* L) growing in Ecuador and Bolivia. *Emir. J. Food Agric.* **2016**, *28*, 196–200.
15. Muñoz, L.A.; Cobos, A.; Diaz, O.; Aguilera, J.M. Chia seeds: Microstructure, mucilage extraction and hydration. *J. Food Eng.* **2012**, *108*, 216–224.

16. de Falco, B.; Fiore, A.; Rossi, R.; Amato, M.; Lanzotti, V. Metabolomics driven analysis by UAEGC-MS and antioxidant activity of chia (*Salvia hispanica* L.) commercial and mutant seeds. *Food Chem.* **2018**, *254*, 137–143.
17. Luz, J.M.R. da; Nunes, M.D.; Paes, S.A.; Torres, D.P.; Silva, M. de C.S. da; Kasuya, M.C.M. Lignocellulolytic enzyme production of *Pleurotus ostreatus* growth in agroindustrial wastes. *Braz. J. Microbiol.* **2012**, *43*, 1508–1515.
18. Kulczyński, B.; Kobus-Cisowska, J.; Taczanowski, M.; Kmiecik, D.; Gramza-Michałowska, A. The Chemical Composition and Nutritional Value of Chia Seeds - Current State of Knowledge. *Nutrients* **2019**, *11*, 1–16.
19. Coates, W.; Ayerza, R. Pontencial De Produção Da Chia No Noroeste Argentino.Pdf. **1996**, 6690.
20. Villanueva-Bermejo, D.; Calvo, M. V.; Castro-Gómez, P.; Fornari, T.; Fontecha, J. Production of omega 3-rich oils from underutilized chia seeds. Comparison between supercritical fluid and pressurized liquid extraction methods. *Food Res. Int.* **2019**, *115*, 400–407.
21. Musa Özcan, M.; Al-Juhaimi, F.Y.; Mohamed Ahmed, I.A.; Osman, M.A.; Gassem, M.A. Effect of different microwave power setting on quality of chia seed oil obtained in a cold press. *Food Chem.* **2019**, *278*, 190–196.
22. Noshe, A.S.; Al-bayyar, A.H. Effect of extraction method of Chia seeds Oil on its content of fatty acids and antioxidants. *Int Res J Eng Technol.* **2017**, *234*, 1–9.
23. Singh, D. *Quinoa (Chenopodium Quinoa Willd)*; Scientific Publishers, 2019; ISBN 978-93-87991-67-5.
24. Siger, A.; Nogala-Kalucka, M.; Lampart-Szczapa, E. The Content and Antioxidant Activity of Phenolic Compounds in Cold-Pressed Plant Oils. *J. Food Lipids* **2008**, *15*, 137–149.
25. Gunstone, F.D. *Fatty Acid and Lipid Chemistry*; Springer, 2012; ISBN 978-1-4615-4131-8.
26. Paško, P.; Sajewicz, M.; Gorinstein, S.; Zachwieja, Z. Analysis of selected phenolic acids and flavonoids in *Amaranthus cruentus* and *Chenopodium quinoa* seeds and sprouts by HPLC. *Acta Chromatogr.* **2008**, *20*, 661–672.
27. Călinoiu, L.F.; Vodnar, D.C. Whole Grains and Phenolic Acids: A Review on Bioactivity, Functionality, Health Benefits and Bioavailability. *Nutrients* **2018**, *10*.
28. Rosero, O.; Marounek, M.; Břeňová, N.; Lukešová, D. Phytase activity and comparison of chemical composition, phytic acid P content of four varieties of quinoa grain (*Chenopodium quinoa* Willd.). *Acta Agronómica* **2013**, *62*, 13–20.
29. Martirosyan, D.M.; Miroshnichenko, L.A.; Kulakova, S.N.; Pogojeva, A.V.; Zolodov, V.I. Amaranth oil application for coronary heart disease and hypertension. *Lipids Health Dis.* **2007**, *6*, 1.
30. Repo-Carrasco-Valencia, R.; Hellström, J.; Mattila, P. Flavonoids and other phenolic compounds in Andean indigenous grains: Quinoa (*Chenopodium quinoa*), kañiwa (*Chenopodium pallidicaule*) and kiwicha (*Amaranthus caudatus*) | Scinapse | Academic search engine for paper. *Food HydrocolloidsScinapse* **2010**, *120*, 128–133.
31. Ullah, R.; Nadeem, M.; Khalique, A.; Imran, M.; Mehmood, S.; Javid, A.; Hussain, J. Nutritional and therapeutic perspectives of Chia (*Salvia hispanica* L.): a review. *J. Food Sci. Technol.* **2016**, *53*, 1750–1758.
32. Coelho, M.S.; Salas-Mellado, M. de las M. How extraction method affects the physicochemical and functional properties of chia proteins. *Lwt* **2018**, *96*, 26–33.

33. Urbizo-Reyes, U.; San Martín-González, M.F.; García-Bravo, J.; López Malo, A.; Liceaga, A.M. *Physicochemical characteristics of chia seed (Salvia hispanica) protein hydrolysates produced using ultrasonication followed by microwave-assisted hydrolysis*; Elsevier Ltd, 2019; ISBN 1765430909.
34. Rahman, M.J.; de Camargo, A.C.; Shahidi, F. Phenolic and polyphenolic profiles of chia seeds and their in vitro biological activities. *J. Funct. Foods* **2017**, *35*, 622–634.
35. Uribe, J.A.R.; Perez, J.I.N.; Kaul, H.C.; Rubio, G.R.; Alcocer, C.G. Extraction of oil from chia seeds with supercritical CO<sub>2</sub>. *J. Supercrit. Fluids* **2011**, *56*, 174–178.
36. Martínez-Cruz, O.; Paredes-López, O. Phytochemical profile and nutraceutical potential of chia seeds (*Salvia hispanica* L.) by ultra high performance liquid chromatography. *J. Chromatogr. A* **2014**, *1346*, 43–48.
37. Brglez Mojzer, E.; Knez Hrnčič, M.; Škerget, M.; Knez, Ž.; Bren, U. Polyphenols: Extraction Methods, Antioxidative Action, Bioavailability and Anticarcinogenic Effects. *Mol. Basel Switz.* **2016**, *21*, 1–38
38. Sargi, S.C.; Silva, B.C.; Santos, H.M.C.; Montanher, P.F.; Boeing, J.S.; Santos Júnior, O.O.; Souza, N.E.; Visentainer, J.V. Antioxidant capacity and chemical composition in seeds rich in omega-3: chia, flax, and perilla. *Food Sci. Technol.* **2013**, *33*, 541–548.
39. Guindani, C.; Podestá, R.; Block, J.M.; Rossi, M.J.; Mezzomo, N.; Ferreira, S.R.S. Valorization of chia (*Salvia hispanica*) seed cake by means of supercritical fluid extraction. *J. Supercrit. Fluids* **2016**, *112*, 67–75.
40. Alcântara, M.A.; de Lima Brito Polari, I.; de Albuquerque Meireles, B.R.L.; de Lima, A.E.A.; da Silva Junior, J.C.; de Andrade Vieira, É.; dos Santos, N.A.; de Magalhães Cordeiro, A.M.T. Effect of the solvent composition on the profile of phenolic compounds extracted from chia seeds. *Food Chem.* **2019**, *275*, 489–496.
41. Kondo, S.; Teongtip, R.; Srichana, D.; Itharat, A. Antimicrobial activity of rice bran extracts for diarrheal disease. *J. Med. Assoc. Thail. Chotmaihet Thangphaet* **2011**, *94*, S117–21.
42. Morshed, S.; Islam, S.S. Antimicrobial activity and phytochemical properties of corn (*Zea mays* L.) silk. *SKUAST J. Res.* **2015**, *17*, 8–14.
43. Saha, S.; Islam, Z.; Islam, S.; Hossain, M.S.; Islam, S.M. Evaluation of antimicrobial activity of wheat (*Triticum aestivum* L.) against four bacterial strains. *SKUAST J. Res.* **2018**, *20*, 58–62.
44. Park, J.H.; Lee, Y.J.; Kim, Y.H.; Yoon, K.S. Antioxidant and Antimicrobial Activities of Quinoa (*Chenopodium quinoa* Willd.) Seeds Cultivated in Korea. *Prev. Nutr. Food Sci.* **2017**, *22*, 195–202.
45. Cherian, P.; Sheela, D. Antimicrobial activity of Amaranth Alkaloid against pathogenic microbes. *Int. J. Herb. Med.* **2016**, *4*, 70–72.
46. Labanca, R.A.; Svelander, C.; Eliasson, L.; Linhares, R.; Araújo, B. De; Ahrné, L.; Alming, M. Supercritical carbon dioxide extraction and conventional extraction of chia seed oils : chemical composition and lipid oxidation. *Int. J. Res. Available* **2017**, *04*, 563–572.
47. Ixtaina, V.Y.; Vega, A.; Nolasco, S.M.; Tomás, M.C.; Gimeno, M.; Bárzana, E.; Tecante, A. Supercritical carbon dioxide extraction of oil from Mexican chia seed (*Salvia hispanica* L.): Characterization and process optimization. *J. Supercrit. Fluids* **2010**, *55*, 192–199.
48. Ixtaina, V.Y.; Martínez, M.L.; Spotorno, V.; Mateo, C.M.; Maestri, D.M.; Diehl, B.W.K.; Nolasco, S.M.; Tomás, M.C. Characterization of chia seed oils obtained by pressing and solvent extraction. *J. Food Compos. Anal.* **2011**, *24*, 166–174.

49. Da Silva, C.M.; Zanqui, A.B.; Gohara, A.K.; De Souza, A.H.P.; Cardozo-Filho, L.; Visentainer, J.V.; Rovigatti Chiavelli, L.U.; Bittencourt, P.R.S.; Da Silva, E.A.; Matsushita, M. Compressed n-propane extraction of lipids and bioactive compounds from Perilla (*Perilla frutescens*). *J. Supercrit. Fluids* **2015**, *102*, 1–8.
50. de Campo, C.; dos Santos, P.P.; Costa, T.M.H.; Paese, K.; Guterres, S.S.; Rios, A. de O.; Flôres, S.H. Nanoencapsulation of chia seed oil with chia mucilage (*Salvia hispanica* L.) as wall material: Characterization and stability evaluation. *Food Chem.* **2017**, *234*, 1–9.
51. Mello, B.T.F. de; Garcia, V.A. dos S.; Silva, C. da Ultrasound-Assisted Extraction of Oil from Chia (*Salvia hispânica* L.) Seeds: Optimization Extraction and Fatty Acid Profile. *J. Food Process Eng.* **2017**, *40*, 1–8.
52. Noshe, A.S.; Al-bayyar, A.H. Effect of extraction method of Chia seeds Oil on its content of fatty acids and antioxidants. *Int. Res. J. Eng. Technol. IRJET* **2017**, *4*, 545–551.
53. Fernandes, S.S.; Tonato, D.; Mazutti, M.A.; de Abreu, B.R.; da Costa Cabrera, D.; D'Oca, C.D.R.M.; Prentice-Hernández, C.; Salas-Mellado, M. de las M. Yield and quality of chia oil extracted via different methods. *J. Food Eng.* **2019**, *262*, 200–208.
54. Friedman, M.; Levin, C.E.; Henika, P.R. Addition of phytochemical-rich plant extracts mitigate the antimicrobial activity of essential oil/wine mixtures against *Escherichia coli* O157:H7 but not against *Salmonella enterica*. *Food Control* **2017**, *73*, 562–565.
55. Laczowski, M.S.; Gonçalves, T.R.; Gomes, S.T.M.; Março, P.H.; Valderrama, P.; Matsushita, M. Application of chemometric methods in the evaluation of antioxidants activity from degreased chia seeds extracts. *Lwt* **2018**, *95*, 303–307.
56. Oliveira-Alves, S.C.; Vendramini-Costa, D.B.; Betim Cazarin, C.B.; Maróstica Júnior, M.R.; Borges Ferreira, J.P.; Silva, A.B.; Prado, M.A.; Bronze, M.R. Characterization of phenolic compounds in chia (*Salvia hispanica* L.) seeds, fiber flour and oil. *Food Chem.* **2017**, *232*, 295–305.
57. Nieman, D.C.; Cayea, E.J.; Austin, M.D.; Henson, D.A.; McAnulty, S.R.; Jin, F. Chia seed does not promote weight loss or alter disease risk factors in overweight adults. *Nutr. Res.* **2009**, *29*, 414–418.
58. Ixtaina Vanesa Y.; Mattea Facundo; Cardarelli Damián A.; Mattea Miguel A.; Nolasco Susana M.; Tomás Mabel C. Supercritical Carbon Dioxide Extraction and Characterization of Argentinean Chia Seed Oil. *J. Am. Oil Chem. Soc.* **2010**, *88*, 289–298.
59. Fernandes, S.S.; Salas-Mellado, M. de L.M. Addition of chia seed mucilage for reduction of fat content in bread and cakes. *Food Chem.* **2017**, *227*, 237–244.
60. Castejón, N.; Moreno-Pérez, S.; Abreu Silveira, E.; Fernández Lorente, G.; Guisán, J.M.; Señoráns, F.J. Synthesis of omega-3 ethyl esters from chia oil catalyzed by polyethylene glycol-modified lipases with improved stability. *Food Chem.* **2019**, *271*, 433–439.
61. Kobus-Cisowska, J.; Szymanowska, D.; Maciejewska, P.; Kmiecik, D.; Gramza-Michałowska, A.; Kulczyński, B.; Cielecka-Piontek, J. In vitro screening for acetylcholinesterase and butyrylcholinesterase inhibition and antimicrobial activity of chia seeds (*Salvia hispanica*). *Electron. J. Biotechnol.* **2019**, *37*, 1–10.
62. Dick, M.; Costa, T.M.H.; Gomaa, A.; Subirade, M.; Rios, A. de O.; Flôres, S.H. Edible film production from chia seed mucilage: Effect of glycerol concentration on its physicochemical and mechanical properties. *Carbohydr. Polym.* **2015**, *130*, 198–205.

63. Timilsena, Y.P.; Adhikari, R.; Kasapis, S.; Adhikari, B. Molecular and functional characteristics of purified gum from Australian chia seeds. *Carbohydr. Polym.* **2016**, *136*, 128–136.
64. Julio, L.M.; Ixtaina, V.Y.; Fernández, M.A.; Sánchez, R.M.T.; Wagner, J.R.; Nolasco, S.M.; Tomás, M.C. Chia seed oil-in-water emulsions as potential delivery systems of  $\omega$ -3 fatty acids. *J. Food Eng.* **2015**, *162*, 48–55.
65. Julio, L.M.; Copado, C.N.; Diehl, B.W.K.; Ixtaina, V.Y.; Tomás, M.C. Chia bilayer emulsions with modified sunflower lecithins and chitosan as delivery systems of omega-3 fatty acids. *LWT* **2018**, *89*, 581–590.
66. Timilsena, Y.P.; Adhikari, R.; Barrow, C.J.; Adhikari, B. Digestion behaviour of chia seed oil encapsulated in chia seed protein-gum complex coacervates. *Food Hydrocoll.* **2017**, *66*, 71–81.
67. Vuksan, V.; Jenkins, A.L.; Brissette, C.; Choleva, L.; Jovanovski, E.; Gibbs, A.L.; Bazinet, R.P.; Au-Yeung, F.; Zurbau, A.; Ho, H.V.T.; et al. Salba-chia (*Salvia hispanica* L.) in the treatment of overweight and obese patients with type 2 diabetes: A double-blind randomized controlled trial. *Nutr. Metab. Cardiovasc. Dis.* **2017**, *27*, 138–146.
68. Vuksan, V.; Choleva, L.; Jovanovski, E.; Jenkins, A.L.; Au-Yeung, F.; Dias, A.G.; Ho, H.V.T.; Zurbau, A.; Duvnjak, L. Comparison of flax (*Linum usitatissimum*) and Salba-chia (*Salvia hispanica* L.) seeds on postprandial glycemia and satiety in healthy individuals: a randomized, controlled, crossover study. *Eur. J. Clin. Nutr.* **2017**, *71*, 234.
69. Toscano, L.T.; da Silva, C.S.O.; Toscano, L.T.; de Almeida, A.E.M.; da Cruz Santos, A.; Silva, A.S. Chia flour supplementation reduces blood pressure in hypertensive subjects. *Plant Foods Hum. Nutr.* **2014**, *69*, 392–398.
70. Ayerza, R.; Coates, W. Seed yield, oil content and fatty acid composition of three botanical sources of  $\omega$ -3 fatty acid planted in the Yungas ecosystem of tropical Argentina. *Trop. Sci.* **2007**, *47*, 183–187.
71. Vertommen, J.; Van de Sompel, A.M.; Loenders, M.; Van der Velpen, C.; De Leeuw, I. Efficacy and Safety of 1 Month Supplementation of SALBA (*Salvia Hispanica Alba*) Grain to Diet of Normal Adults on Body Parameters. In Proceedings of the Blood Pressure, Serum Lipids, Minerals Status and Haematological Parameters. Results of a Pilot Study. The 23th International Symposium on Diabetes and Nutrition of the European Association for the Study of Diabetes; 2005.
72. Segura Campos, M.R.; Peralta González, F.; Chel Guerrero, L.; Betancur Ancona, D. Angiotensin I-Converting Enzyme Inhibitory Peptides of Chia (*Salvia hispanica*) Produced by Enzymatic Hydrolysis Available online: <https://www.hindawi.com/journals/ijfs/2013/158482/abs/> (accessed on Oct 10, 2019).
73. Rodea-González, D.A.; Cruz-Olivares, J.; Román-Guerrero, A.; Rodríguez-Huezo, M.E.; Vernon-Carter, E.J.; Pérez-Alonso, C. Spray-dried encapsulation of chia essential oil (*Salvia hispanica* L.) in whey protein concentrate-polysaccharide matrices. *J. Food Eng.* **2012**, *111*, 102–109.
74. Ayerza, R.; Coates, W. *Chia: Rediscovering a Forgotten Crop of the Aztecs*; University of Arizona Press, 2005; ISBN 978-0-8165-2488-4.
75. Adams, J.D.; Wang, R.; Yang, J.; Lien, E.J. Preclinical and clinical examinations of *Salvia miltiorrhiza* and its tanshinones in ischemic conditions. *Chin. Med.* **2006**, *1*, 3.



76. Adams, J.D.; Wall, M.; Garcia, C. Salvia columbariae contains tanshinones. *Evid. Based Complement. Alternat. Med.* **2005**, *2*, 107–110.
77. European Food Safety Authority | Trusted science for safe food Available online: <http://www.efsa.europa.eu/en> (accessed on Oct 10, 2019).
78. Nieman, D.; Gillitt, N.; Meaney, M.; Dew, D. No positive influence of ingesting chia seed oil on human running performance. *Nutrients* **2015**, *7*, 3666–3676.
79. Nieman, D.C.; Gillitt, N.; Jin, F.; Henson, D.A.; Kennerly, K.; Shanely, R.A.; Ore, B.; Su, M.; Schwartz, S. Chia seed supplementation and disease risk factors in overweight women: a metabolomics investigation. *J. Altern. Complement. Med.* **2012**, *18*, 700–708.
80. Guevara-Cruz, M.; Tovar, A.R.; Aguilar-Salinas, C.A.; Medina-Vera, I.; Gil-Zenteno, L.; Hernández-Viveros, I.; López-Romero, P.; Ordaz-Nava, G.; Canizales-Quinteros, S.; Guillen Pineda, L.E. A dietary pattern including nopal, chia seed, soy protein, and oat reduces serum triglycerides and glucose intolerance in patients with metabolic syndrome. *J. Nutr.* **2011**, *142*, 64–69.
81. Illian, T.G.; Casey, J.C.; Bishop, P.A. Omega 3 chia seed loading as a means of carbohydrate loading. *J. Strength Cond. Res.* **2011**, *25*, 61–65.

**Author Contributions:** M.I. performed an extensive literature search and wrote the majority of the paper; D.C. and M.K.H. revised the content of the review, M.K.H. and Ž.K. supervised the writing.

**Conflicts of Interest:** The authors declare no conflict of interest.

### Abbreviations

|                   |                                                |
|-------------------|------------------------------------------------|
| ABST <sup>+</sup> | Monocationic radical from ABTS diammonium salt |
| CO <sub>2</sub>   | Carbon dioxide                                 |
| DPPH              | 2,2-dyphenyl-1-picrylhydrazyl                  |
| FRAP              | Fluorescence recovery after photobleaching     |
| HPLC              | High Performance Liquid Chromatography         |
| DSC               | Differential Scanning Calorimetry              |
| SFC               | Supercritical fluids                           |
| PLE               | Pressured-liquid Extraction                    |
| UHLPC             | Ultra-high Performance Liquid Chromatography   |
| UPLC              | Ultra-performance Liquid Chromatography        |
